# Supplementary material for: A Tourist-like MITE insertion in the upstream region of the BnFLC.A10 gene is associated with vernalization requirement in rapeseed (Brassica napus L.)
Source: PubMed Central journal article supplement (PMC3562271; doi:10.1186/1471-2229-12-238), 2012-12-15
Supplement: 1471-2229-12-238-S1.pdf [file 1471-2229-12-238-S1.pdf]

### Additional file 1. Motif prediction of 621bp-MITE

| Code        | Taxon                       | Start | Strand | Length | Motif       | Function                                                            |
|-------------|-----------------------------|-------|--------|--------|-------------|---------------------------------------------------------------------|
| ARE         | <i>Zea mays</i>             | 408   | +      | 6      | TGGTTT      | cis-acting regulatory element essential for the anaerobic induction |
| ARE         | <i>Zea mays</i>             | 602   | -      | 6      | TGGTTT      | cis-acting regulatory element essential for the anaerobic induction |
| Box 4       | <i>Petroselinum crispum</i> | 322   | +      | 6      | ATTAAT      | part of a conserved DNA module involved in light responsiveness     |
| Box I       | <i>Pisum sativum</i>        | 257   | +      | 7      | TTTCAAA     | light responsive element                                            |
| CAAT-box    | <i>Brassica rapa</i>        | 88    | -      | 5      | CAAAT       | common cis-acting element in promoter and enhancer regions          |
| CAAT-box    | <i>Hordeum vulgare</i>      | 538   | -      | 4      | CAAT        | common cis-acting element in promoter and enhancer regions          |
| CAAT-box    | <i>Hordeum vulgare</i>      | 186   | +      | 4      | CAAT        | common cis-acting element in promoter and enhancer regions          |
| CAAT-box    | <i>Hordeum vulgare</i>      | 606   | +      | 4      | CAAT        | common cis-acting element in promoter and enhancer regions          |
| CAAT-box    | <i>Arabidopsis thaliana</i> | 116   | -      | 5      | CCAAT       | common cis-acting element in promoter and enhancer regions          |
| CAAT-box    | <i>Hordeum vulgare</i>      | 566   | +      | 4      | CAAT        | common cis-acting element in promoter and enhancer regions          |
| CAAT-box    | <i>Brassica rapa</i>        | 519   | -      | 5      | CAAAT       | common cis-acting element in promoter and enhancer regions          |
| CAAT-box    | <i>Arabidopsis thaliana</i> | 565   | +      | 5      | CCAAT       | common cis-acting element in promoter and enhancer regions          |
| CAAT-box    | <i>Glycine max</i>          | 115   | -      | 5      | CAATT       | common cis-acting element in promoter and enhancer regions          |
| CAAT-box    | <i>Arabidopsis thaliana</i> | 605   | +      | 5      | CCAAT       | common cis-acting element in promoter and enhancer regions          |
| CAAT-box    | <i>Brassica rapa</i>        | 155   | +      | 5      | CAAAT       | common cis-acting element in promoter and enhancer regions          |
| E2Fa        | <i>Nicotiana tabacum</i>    | 596   | -      | 8      | TTTCCCGC    |                                                                     |
| GT1-motif   | <i>Arabidopsis thaliana</i> | 145   | +      | 6      | GGTTAA      | light responsive element                                            |
| GT1-motif   | <i>Arabidopsis thaliana</i> | 168   | +      | 6      | GGTTAA      | light responsive element                                            |
| HSE         | <i>Brassica oleracea</i>    | 274   | -      | 9      | AAAAAATTTTC | cis-acting element involved in heat stress responsiveness           |
| Skn-1_motif | <i>Oryza sativa</i>         | 139   | -      | 5      | GTCAT       | cis-acting regulatory element required for endosperm expression     |
| Sp1         | <i>Zea mays</i>             | 57    | -      | 5.5    | CC(G/A)CCC  | light responsive element                                            |
| Sp1         | <i>Oryza sativa</i>         | 450   | -      | 6      | GGGCGG      | light responsive element                                            |
| Sp1         | <i>Zea mays</i>             | 440   | +      | 5      | CC(G/A)CCC  | light responsive element                                            |
| Sp1         | <i>Zea mays</i>             | 588   | -      | 5.5    | CC(G/A)CCC  | light responsive element                                            |

|          |                                |     |   |    |              |                                                         |
|----------|--------------------------------|-----|---|----|--------------|---------------------------------------------------------|
| TATA-box | <i>Lycopersicon esculentum</i> | 79  | + | 5  | TTTTA        | core promoter element around -30 of transcription start |
| TATA-box | <i>Glycine max</i>             | 175 | + | 5  | TAATA        | core promoter element around -30 of transcription start |
| TATA-box | <i>Pisum sativum</i>           | 196 | - | 8  | TATAAAAT     | core promoter element around -30 of transcription start |
| TATA-box | <i>Arabidopsis thaliana</i>    | 197 | - | 7  | TATAAAA      | core promoter element around -30 of transcription start |
| TATA-box | <i>Arabidopsis thaliana</i>    | 198 | - | 6  | TATAAA       | core promoter element around -30 of transcription start |
| TATA-box | <i>Arabidopsis thaliana</i>    | 199 | - | 7  | TATATAA      | core promoter element around -30 of transcription start |
| TATA-box | <i>Arabidopsis thaliana</i>    | 200 | + | 4  | TATA         | core promoter element around -30 of transcription start |
| TATA-box | <i>Brassica oleracea</i>       | 201 | + | 7  | ATATAAT      | core promoter element around -30 of transcription start |
| TATA-box | <i>Arabidopsis thaliana</i>    | 202 | + | 11 | TATAAATATAAA | core promoter element around -30 of transcription start |
| TATA-box | <i>Brassica napus</i>          | 206 | + | 6  | ATTATA       | core promoter element around -30 of transcription start |
| TATA-box | <i>Arabidopsis thaliana</i>    | 207 | - | 5  | TATAA        | core promoter element around -30 of transcription start |
| TATA-box | <i>Arabidopsis thaliana</i>    | 208 | + | 6  | TATAAA       | core promoter element around -30 of transcription start |
| TATA-box | <i>Lycopersicon esculentum</i> | 210 | - | 5  | TTTTA        | core promoter element around -30 of transcription start |
| TATA-box | <i>Glycine max</i>             | 228 | + | 5  | TAATA        | core promoter element around -30 of transcription start |
| TATA-box | <i>Glycine max</i>             | 231 | - | 5  | TAATA        | core promoter element around -30 of transcription start |
| TATA-box | <i>Brassica napus</i>          | 232 | + | 6  | ATTATA       | core promoter element around -30 of transcription start |
| TATA-box | <i>Arabidopsis thaliana</i>    | 233 | - | 5  | TATAA        | core promoter element around -30 of transcription start |
| TATA-box | <i>Arabidopsis thaliana</i>    | 234 | + | 4  | TATA         | core promoter element around -30 of transcription start |
| TATA-box | <i>Glycine max</i>             | 236 | + | 5  | TAATA        | core promoter element around -30 of transcription start |
| TATA-box | <i>Brassica napus</i>          | 250 | + | 6  | ATTATA       | core promoter element around -30 of transcription start |
| TATA-box | <i>Arabidopsis thaliana</i>    | 251 | - | 5  | TATAA        | core promoter element around -30 of transcription start |
| TATA-box | <i>Arabidopsis thaliana</i>    | 252 | + | 4  | TATA         | core promoter element around -30 of transcription start |
| TATA-box | <i>Arabidopsis thaliana</i>    | 265 | - | 5  | TATAA        | core promoter element around -30 of transcription start |
| TATA-box | <i>Arabidopsis thaliana</i>    | 266 | + | 4  | TATA         | core promoter element around -30 of transcription start |
| TATA-box | <i>Lycopersicon esculentum</i> | 271 | + | 5  | TTTTA        | core promoter element around -30 of transcription start |
| TATA-box | <i>Zea mays</i>                | 279 | - | 8  | TTTAAAAA     | core promoter element around -30 of transcription start |

|          |                                |     |   |   |          |                                                         |
|----------|--------------------------------|-----|---|---|----------|---------------------------------------------------------|
| TATA-box | <i>Lycopersicon esculentum</i> | 280 | + | 5 | TTTTA    | core promoter element around -30 of transcription start |
| TATA-box | <i>Brassica napus</i>          | 286 | + | 6 | ATTATA   | core promoter element around -30 of transcription start |
| TATA-box | <i>Arabidopsis thaliana</i>    | 287 | - | 5 | TATAA    | core promoter element around -30 of transcription start |
| TATA-box | <i>Arabidopsis thaliana</i>    | 288 | + | 4 | TATA     | core promoter element around -30 of transcription start |
| TATA-box | <i>Lycopersicon esculentum</i> | 300 | + | 5 | TTTTA    | core promoter element around -30 of transcription start |
| TATA-box | <i>Lycopersicon esculentum</i> | 305 | + | 5 | TTTTA    | core promoter element around -30 of transcription start |
| TATA-box | <i>Lycopersicon esculentum</i> | 308 | - | 5 | TTTTA    | core promoter element around -30 of transcription start |
| TATA-box | <i>Pisum sativum</i>           | 312 | - | 8 | TATAAAAT | core promoter element around -30 of transcription start |
| TATA-box | <i>Arabidopsis thaliana</i>    | 313 | - | 7 | TATAAAA  | core promoter element around -30 of transcription start |
| TATA-box | <i>Arabidopsis thaliana</i>    | 314 | - | 6 | TATAAA   | core promoter element around -30 of transcription start |
| TATA-box | <i>Arabidopsis thaliana</i>    | 315 | - | 5 | TATAA    | core promoter element around -30 of transcription start |
| TATA-box | <i>Arabidopsis thaliana</i>    | 316 | + | 4 | TATA     | core promoter element around -30 of transcription start |
| TATA-box | <i>Glycine max</i>             | 318 | + | 5 | TAATA    | core promoter element around -30 of transcription start |
| TATA-box | <i>Glycine max</i>             | 321 | - | 5 | TAATA    | core promoter element around -30 of transcription start |
| TATA-box | <i>Lycopersicon esculentum</i> | 328 | - | 5 | TTTTA    | core promoter element around -30 of transcription start |
| TATA-box | <i>Brassica oleracea</i>       | 332 | + | 7 | ATATAAT  | core promoter element around -30 of transcription start |
| TATA-box | <i>Arabidopsis thaliana</i>    | 333 | + | 4 | TATA     | core promoter element around -30 of transcription start |
| TATA-box | <i>Glycine max</i>             | 335 | + | 5 | TAATA    | core promoter element around -30 of transcription start |
| TATA-box | <i>Brassica napus</i>          | 341 | + | 6 | ATATAT   | core promoter element around -30 of transcription start |
| TATA-box | <i>Arabidopsis thaliana</i>    | 342 | + | 4 | TATA     | core promoter element around -30 of transcription start |
| TATA-box | <i>Lycopersicon esculentum</i> | 346 | + | 5 | TTTTA    | core promoter element around -30 of transcription start |
| TATA-box | <i>Arabidopsis thaliana</i>    | 355 | - | 7 | TATAAAA  | core promoter element around -30 of transcription start |
| TATA-box | <i>Arabidopsis thaliana</i>    | 356 | - | 6 | TATAAA   | core promoter element around -30 of transcription start |
| TATA-box | <i>Arabidopsis thaliana</i>    | 357 | - | 5 | TATAA    | core promoter element around -30 of transcription start |
| TATA-box | <i>Arabidopsis thaliana</i>    | 358 | + | 4 | TATA     | core promoter element around -30 of transcription start |
| TATA-box | <i>Lycopersicon esculentum</i> | 368 | + | 5 | TTTTA    | core promoter element around -30 of transcription start |

|            |                                |     |   |    |              |                                                         |
|------------|--------------------------------|-----|---|----|--------------|---------------------------------------------------------|
| TATA-box   | <i>Zea mays</i>                | 369 | + | 8  | TTTAAAAA     | core promoter element around -30 of transcription start |
| TATA-box   | <i>Lycopersicon esculentum</i> | 371 | - | 5  | TTTTA        | core promoter element around -30 of transcription start |
| TATA-box   | <i>Lycopersicon esculentum</i> | 377 | + | 5  | TTTTA        | core promoter element around -30 of transcription start |
| TATA-box   | <i>Arabidopsis thaliana</i>    | 379 | - | 9  | TAAAAATAA    | core promoter element around -30 of transcription start |
| TATA-box   | <i>Lycopersicon esculentum</i> | 383 | + | 5  | TTTTA        | core promoter element around -30 of transcription start |
| TATA-box   | <i>Arabidopsis thaliana</i>    | 385 | - | 9  | TAAAAATAA    | core promoter element around -30 of transcription start |
| TATA-box   | <i>Lycopersicon esculentum</i> | 389 | + | 5  | TTTTA        | core promoter element around -30 of transcription start |
| TATA-box   | <i>Oryza sativa</i>            | 395 | - | 7  | TACAAAA      | core promoter element around -30 of transcription start |
| TATA-box   | <i>Arabidopsis thaliana</i>    | 396 | - | 11 | TATAAATATAAA | core promoter element around -30 of transcription start |
| TATA-box   | <i>Daucus carota</i>           | 400 | - | 8  | TATAAATA     | core promoter element around -30 of transcription start |
| TATA-box   | <i>Ac</i>                      | 401 | - | 7  | TATAAAT      | core promoter element around -30 of transcription start |
| TATA-box   | <i>Arabidopsis thaliana</i>    | 402 | - | 6  | TATAAA       | core promoter element around -30 of transcription start |
| TATA-box   | <i>Arabidopsis thaliana</i>    | 403 | - | 5  | TATAA        | core promoter element around -30 of transcription start |
| TATA-box   | <i>Arabidopsis thaliana</i>    | 404 | + | 4  | TATA         | core promoter element around -30 of transcription start |
| TATA-box   | <i>Zea mays</i>                | 412 | - | 8  | TTTAAAAA     | core promoter element around -30 of transcription start |
| TATA-box   | <i>Lycopersicon esculentum</i> | 413 | + | 5  | TTTTA        | core promoter element around -30 of transcription start |
| TATA-box   | <i>Zea mays</i>                | 414 | + | 8  | TTTAAAAA     | core promoter element around -30 of transcription start |
| TATA-box   | <i>Lycopersicon esculentum</i> | 416 | - | 5  | TTTTA        | core promoter element around -30 of transcription start |
| TATA-box   | <i>Lycopersicon esculentum</i> | 490 | + | 5  | TTTTA        | core promoter element around -30 of transcription start |
| Unnamed__4 | <i>Petroselinum hortense</i>   | 441 | + | 4  | CTCC         |                                                         |
| Unnamed__4 | <i>Petroselinum hortense</i>   | 503 | - | 4  | CTCC         |                                                         |
| box E      | <i>Petroselinum crispum</i>    | 604 | + | 9  | ACCCATCAAG   |                                                         |

[PlantCARE: a database of plant cis-acting regulatory elements and a portal to tools for in silico analysis of promoter sequences.](#)

Lescot, M., Dhais, P., Moreau, Y., De Moor, B., Rouz é,P.,and Rombauts, S.Nucleic Acids Res., Database issue(2002), 30(1):325-327.
