# Supplementary material for: A Tourist-like MITE insertion in the upstream region of the BnFLC.A10 gene is associated with vernalization requirement in rapeseed (Brassica napus L.)
Source: PubMed Central journal article supplement (PMC3562271; doi:10.1186/1471-2229-12-238), 2012-12-15
Supplement: 1471-2229-12-238-S2.pdf [file 1471-2229-12-238-S2.pdf]

**Additional file 2. Spring rapeseed and *B. rapa* accessions were used for detecting *Monkey King* existence upstream of *BnFLC.A10* and the orthologous region**

| Name                   | Species                                        | <i>Monkey King</i> existence |
|------------------------|------------------------------------------------|------------------------------|
| VALTTI                 | <i>Brassica rapa</i>                           | No                           |
| CHOKUREI               | <i>Brassica rapa</i>                           | No                           |
| CHOY SIM               | <i>Brassica rapa</i>                           | No                           |
| COW HORN LONG WHITE    | <i>Brassica rapa</i>                           | No                           |
| CPI 57554              | <i>Brassica rapa</i>                           | No                           |
| SUFOLA                 | <i>Brassica rapa</i>                           | No                           |
| HOSIN                  | <i>Brassica rapa</i>                           | No                           |
| KAGA                   | <i>Brassica rapa</i>                           | No                           |
| MEXICO G               | <i>Brassica rapa</i>                           | No                           |
| MIE LOCAL              | <i>Brassica rapa</i>                           | No                           |
| PI 370743              | <i>Brassica rapa</i>                           | No                           |
| POLISH                 | <i>Brassica rapa</i>                           | No                           |
| SOLLUX                 | <i>Brassica rapa</i>                           | No                           |
| TORPE                  | <i>Brassica rapa</i>                           | No                           |
| TURNIP EXTRA EARLY     |                                                | No                           |
| PURPLE TOP MILAN       | <i>Brassica rapa</i>                           | No                           |
| YORK GLOBE             | <i>Brassica rapa</i>                           | No                           |
| PI 179652              | <i>Brassica rapa</i>                           | No                           |
| JUGOSLAVSKY            | <i>Brassica rapa</i>                           | No                           |
| GULLE                  | <i>Brassica rapa</i>                           | No                           |
| JALPAIGURI CL-1        | <i>Brassica rapa</i>                           | No                           |
| TORIA-ITSA             | <i>Brassica rapa</i>                           | No                           |
| PUSA KALYANI           | <i>Brassica rapa</i>                           | No                           |
| CANDLE ATR             | <i>Brassica rapa</i>                           | No                           |
| FATAPUKUR CL-1         | <i>Brassica rapa</i>                           | No                           |
| CPI91433               | <i>Brassica rapa</i> subsp. <i>chinensis</i>   | No                           |
| SALAT YAPONSKII        | <i>Brassica rapa</i> subsp. <i>chinensis</i>   | No                           |
| BI-TCE                 | <i>Brassica rapa</i> subsp. <i>pekinensis</i>  | No                           |
| PIORBAI                | <i>Brassica rapa</i> subsp. <i>chinensis</i>   | No                           |
| K-109                  | <i>Brassica rapa</i> subsp. <i>pekinensis</i>  | No                           |
| MIBUNA                 | <i>Brassica rapa</i> subsp. <i>nipposinica</i> | No                           |
| K-123                  | <i>Brassica rapa</i> subsp. <i>pekinensis</i>  | No                           |
| K-136                  | <i>Brassica rapa</i> subsp. <i>pekinensis</i>  | No                           |
| DUNGANSKAYA            | <i>Brassica rapa</i> subsp. <i>pekinensis</i>  | No                           |
| MIZUNA                 | <i>Brassica rapa</i> subsp. <i>nipposinica</i> | No                           |
| Leielander Waasmunster | <i>Brassica rapa</i>                           | No                           |
| CGN 6850               | <i>Brassica rapa</i>                           | No                           |
| CGN 7222               | <i>Brassica rapa</i>                           | No                           |
| CGN 7226               | <i>Brassica rapa</i>                           | No                           |
| Balady                 | <i>Brassica rapa</i>                           | No                           |
| Tsja Sin               | <i>Brassica rapa</i>                           | No                           |

|                   |                                                 |    |
|-------------------|-------------------------------------------------|----|
| Tsja Sin          | <i>Brassica rapa</i>                            | No |
| CGN 20198         | <i>Brassica rapa</i>                            | No |
| CGN 20736         | <i>Brassica rapa</i>                            | No |
| CGN 20738         | <i>Brassica rapa</i>                            | No |
| Rova, svedjerova  | <i>Brassica rapa</i> subsp. <i>rapa</i>         | No |
| K-4170            | <i>Brassica rapa</i> subsp. <i>oleifera</i>     | No |
| Pusa Chandrina    | <i>Brassica rapa</i>                            | No |
| Somali Sarisa     | <i>Brassica rapa</i>                            | No |
| Candle            | <i>Brassica rapa</i>                            | No |
| Perviridis        | <i>Brassica rapa</i>                            | No |
| CGN07187          | <i>Brassica rapa</i>                            | No |
| CGN07216          | <i>Brassica rapa</i>                            | No |
| CGN07222          | <i>Brassica rapa</i>                            | No |
| Balady            | <i>Brassica rapa</i>                            | No |
| Tientsin          | <i>Brassica rapa</i>                            | No |
| Xiao qing kou     | <i>Brassica rapa</i>                            | No |
| CGN15218          | <i>Brassica rapa</i>                            | No |
| Jinengu-Kabu      | <i>Brassica rapa</i>                            | No |
| NABAL DE GREILOS  | <i>Brassica rapa</i> subsp. <i>rapa</i>         | No |
| HRI 6175          | <i>Brassica rapa</i> subsp. <i>pekinensis</i>   | No |
| NOZAKI EARLY      | <i>Brassica rapa</i> subsp. <i>pekinensis</i>   | No |
| HRI 8170          | <i>Brassica rapa</i> subsp. <i>rapa</i>         | No |
| BRA 228           | <i>Brassica rapa</i> subsp. <i>chinensis</i>    | No |
| Matsushima Shin 2 | <i>Brassica rapa</i> subsp. <i>pekinensis</i>   | No |
| BRA 981 / 01      | <i>Brassica rapa</i> subsp. <i>pekinensis</i>   | No |
| Horpaci Lila      | <i>Brassica rapa</i> subsp. <i>rapa</i>         | No |
| Rapa sponsa       | <i>Brassica rapa</i> subsp. <i>oleifera</i>     | No |
| Wase Mibuna       | <i>Brassica rapa</i> subsp. <i>nipposinica</i>  | No |
| BRA 1302 / 01     | <i>Brassica rapa</i> subsp. <i>pekinensis</i>   | No |
| BRA 1304 / 01     | <i>Brassica rapa</i> subsp. <i>pekinensis</i>   | No |
| Esti Naeris       | <i>Brassica rapa</i> subsp. <i>rapa</i>         | No |
| BRA 1005          | <i>Brassica rapa</i> subsp. <i>oleifera</i>     | No |
| BRA 41            | <i>Brassica rapa</i> subsp. <i>oleifera</i>     | No |
| B 046             | <i>Brassica rapa</i> subsp. <i>trilocularis</i> | No |
| Pusa Kalyani      | <i>Brassica rapa</i> subsp. <i>dichotoma</i>    | No |
| CR2867 / 03       | <i>Brassica rapa</i>                            | No |
| CR2881 / 79       | <i>Brassica rapa</i>                            | No |
| CR2901 / 82       | <i>Brassica rapa</i>                            | No |
| Baijian 13        | <i>Brassica rapa</i> subsp. <i>oleifera</i>     | No |
| Chengduaiyoucai   | <i>Brassica rapa</i> subsp. <i>oleifera</i>     | No |
| Chiifu            | <i>Brassica rapa</i> subsp. <i>pekinensis</i>   | No |
| Chunqiuwang       | <i>Brassica rapa</i> subsp. <i>pekinensis</i>   | No |
| Colt              | <i>Brassica rapa</i>                            | No |
| Denglongzhong     | <i>Brassica rapa</i> subsp. <i>oleifera</i>     | No |

|                    |                                                |    |
|--------------------|------------------------------------------------|----|
| Dongkoutianyoucai  | <i>Brassica rapa</i> subsp. <i>oleifera</i>    | No |
| DS17D              | <i>Brassica rapa</i>                           | No |
| Fengkang70         | <i>Brassica rapa</i> subsp. <i>pekinensis</i>  | No |
| Hongcaitaierzaozi  | <i>Brassica rapa</i> var. <i>purpuraria</i>    | No |
| Huabai2            | <i>Brassica rapa</i> subsp. <i>pekinensis</i>  | No |
| Huangxinwubaicai   | <i>Brassica rapa</i> subsp. <i>pekinensis</i>  | No |
| Maverick           | <i>Brassica rapa</i> subsp. <i>oleifera</i>    | No |
| Qingchun           | <i>Brassica rapa</i> subsp. <i>pekinensis</i>  | No |
| Qingqing           | <i>Brassica rapa</i> subsp. <i>pekinensis</i>  | No |
| Taiyuanerqing      | <i>Brassica rapa</i> subsp. <i>pekinensis</i>  | No |
| Teji49huangcaixin  | <i>Brassica rapa</i> var. <i>parachinensis</i> | No |
| Tianmenyoucaibai   | <i>Brassica rapa</i> subsp. <i>oleifera</i>    | No |
| Torch              | <i>Brassica rapa</i>                           | No |
| V02D0181           | <i>Brassica rapa</i> var. <i>parachinensis</i> | No |
| V02D0209           | <i>Brassica rapa</i> var. <i>parachinensis</i> | No |
| Wulitianyoucai     | <i>Brassica rapa</i> subsp. <i>oleifera</i>    | No |
| Xinghuayoucai      | <i>Brassica rapa</i> subsp. <i>oleifera</i>    | No |
| Yuqing101B-4       | <i>Brassica rapa</i> subsp. <i>pekinensis</i>  | No |
| 488youqingcaixinF1 | <i>Brassica rapa</i> var. <i>parachinensis</i> | No |
| CB Trilogy         | <i>Brassica napus</i>                          | No |
| CB Telfer          | <i>Brassica napus</i>                          | No |
| GSC 5              | <i>Brassica napus</i>                          | No |
| CB Pilbara         | <i>Brassica napus</i>                          | No |
| CB Trigold         | <i>Brassica napus</i>                          | No |
| CB Tanami          | <i>Brassica napus</i>                          | No |
| Tranby             | <i>Brassica napus</i>                          | No |
| Tarcoola           | <i>Brassica napus</i>                          | No |
| CB Boomer          | <i>Brassica napus</i>                          | No |
| Monty              | <i>Brassica napus</i>                          | No |
| Surpass404CL       | <i>Brassica napus</i>                          | No |
| ATR-Cobbler        | <i>Brassica napus</i>                          | No |
| TornadoTT          | <i>Brassica napus</i>                          | No |
| ThunderTT          | <i>Brassica napus</i>                          | No |
| TawrifficTT        | <i>Brassica napus</i>                          | No |
| RottnestTTC        | <i>Brassica napus</i>                          | No |
| Scoop              | <i>Brassica napus</i>                          | No |
| ATR-Banjo          | <i>Brassica napus</i>                          | No |
| Surpass402CL       | <i>Brassica napus</i>                          | No |
| BLN3343*CO0401     | <i>Brassica napus</i>                          | No |
| ATR-Barra          | <i>Brassica napus</i>                          | No |
| Surpass400         | <i>Brassica napus</i>                          | No |
| CB Argyle          | <i>Brassica napus</i>                          | No |
| SARDI607           | <i>Brassica napus</i>                          | No |
| Surpass501TT       | <i>Brassica napus</i>                          | No |

|                  |                       |    |
|------------------|-----------------------|----|
| FlindersTTC      | <i>Brassica napus</i> | No |
| Dunkeld          | <i>Brassica napus</i> | No |
| Lantern          | <i>Brassica napus</i> | No |
| BLN3343*CO0402   | <i>Brassica napus</i> | No |
| Surpass603CL     | <i>Brassica napus</i> | No |
| Hyola60          | <i>Brassica napus</i> | No |
| Hyola61          | <i>Brassica napus</i> | No |
| ATR-Hyden        | <i>Brassica napus</i> | No |
| Karoo            | <i>Brassica napus</i> | No |
| Wesroona         | <i>Brassica napus</i> | No |
| TERI (OO)R9903   | <i>Brassica napus</i> | No |
| Purler           | <i>Brassica napus</i> | No |
| AG-Outback       | <i>Brassica napus</i> | No |
| 03-p74-6         | <i>Brassica napus</i> | No |
| BLN3347          | <i>Brassica napus</i> | No |
| Charlton         | <i>Brassica napus</i> | No |
| ATR409           | <i>Brassica napus</i> | No |
| Georgie          | <i>Brassica napus</i> | No |
| 03-p74-3         | <i>Brassica napus</i> | No |
| ZY009            | <i>Brassica napus</i> | No |
| ATR-Beacon       | <i>Brassica napus</i> | No |
| Oscar            | <i>Brassica napus</i> | No |
| Grouse           | <i>Brassica napus</i> | No |
| BravoTT          | <i>Brassica napus</i> | No |
| ATR-Marlin       | <i>Brassica napus</i> | No |
| WA050088         | <i>Brassica napus</i> | No |
| Nindoo           | <i>Brassica napus</i> | No |
| Shiralee         | <i>Brassica napus</i> | No |
| BLN2852-03W02    | <i>Brassica napus</i> | No |
| 95*306-310.3.9   | <i>Brassica napus</i> | No |
| BLN2737*CO0203-1 | <i>Brassica napus</i> | No |
| Ag-Muster        | <i>Brassica napus</i> | No |
| RocketCL         | <i>Brassica napus</i> | No |
| RSO94-67 (98-18) | <i>Brassica napus</i> | No |
| ATR-Signal       | <i>Brassica napus</i> | No |
| WA050097         | <i>Brassica napus</i> | No |
| HurricaneTT      | <i>Brassica napus</i> | No |
| Av-Opal          | <i>Brassica napus</i> | No |
| BLN1990          | <i>Brassica napus</i> | No |
| BLN3614          | <i>Brassica napus</i> | No |
| Rivette          | <i>Brassica napus</i> | No |
| ATR-Summitt      | <i>Brassica napus</i> | No |
| Ripper           | <i>Brassica napus</i> | No |
| 44Y06            | <i>Brassica napus</i> | No |

|                           |                       |    |
|---------------------------|-----------------------|----|
| Range                     | <i>Brassica napus</i> | No |
| Yickadee                  | <i>Brassica napus</i> | No |
| ZY008                     | <i>Brassica napus</i> | No |
| WA050096                  | <i>Brassica napus</i> | No |
| WarriorCL                 | <i>Brassica napus</i> | No |
| Av-Jade                   | <i>Brassica napus</i> | No |
| Skipton                   | <i>Brassica napus</i> | No |
| 45C75                     | <i>Brassica napus</i> | No |
| Rainbow                   | <i>Brassica napus</i> | No |
| Mystic                    | <i>Brassica napus</i> | No |
| Ding110                   | <i>Brassica napus</i> | No |
| Qu1104                    | <i>Brassica napus</i> | No |
| StormTT                   | <i>Brassica napus</i> | No |
| Barossa                   | <i>Brassica napus</i> | No |
| Av-Sapphire               | <i>Brassica napus</i> | No |
| Wesbarker                 | <i>Brassica napus</i> | No |
| BLN2762                   | <i>Brassica napus</i> | No |
| 45Y77                     | <i>Brassica napus</i> | No |
| Zhongshu-ang N0.4 (30920) | <i>Brassica napus</i> | No |
| BLN3303*CR0302            | <i>Brassica napus</i> | No |
| 46C04                     | <i>Brassica napus</i> | No |
| Hyola76                   | <i>Brassica napus</i> | No |
| 03-p74-11                 | <i>Brassica napus</i> | No |
| 45C05                     | <i>Brassica napus</i> | No |
| Zhongyou-za No.8          | <i>Brassica napus</i> | No |
| Yu 178                    | <i>Brassica napus</i> | No |
| 46C76                     | <i>Brassica napus</i> | No |
| 05-P36 R                  | <i>Brassica napus</i> | No |
| 46Y78                     | <i>Brassica napus</i> | No |
| Tatyoon                   | <i>Brassica napus</i> | No |
| ATR-EYRE                  | <i>Brassica napus</i> | No |
| Fan189                    | <i>Brassica napus</i> | No |
| 671109                    | <i>Brassica napus</i> | No |
| GASGOTT                   | <i>Brassica napus</i> | No |
| Zhongshu-ang N0.4 (30872) | <i>Brassica napus</i> | No |
| P3083                     | <i>Brassica napus</i> | No |
| Maluka                    | <i>Brassica napus</i> | No |
| AG-Emblem                 | <i>Brassica napus</i> | No |
| Ag-Comet                  | <i>Brassica napus</i> | No |
| Drakkar                   | <i>Brassica napus</i> | No |
| Fan028                    | <i>Brassica napus</i> | No |
| Zhongyou 821              | <i>Brassica napus</i> | No |
| 44C73                     | <i>Brassica napus</i> | No |
| Av-Ruby                   | <i>Brassica napus</i> | No |

|                   |                       |    |
|-------------------|-----------------------|----|
| Fan023            | <i>Brassica napus</i> | No |
| ZY013             | <i>Brassica napus</i> | No |
| ZY002             | <i>Brassica napus</i> | No |
| Hyola50           | <i>Brassica napus</i> | No |
| ZY007             | <i>Brassica napus</i> | No |
| Ag-Spectrum       | <i>Brassica napus</i> | No |
| P624              | <i>Brassica napus</i> | No |
| ZY003             | <i>Brassica napus</i> | No |
| Wesreo            | <i>Brassica napus</i> | No |
| N001-28-246-5-4   | <i>Brassica napus</i> | No |
| 06-P71-2          | <i>Brassica napus</i> | No |
| Cescaljarni repka | <i>Brassica napus</i> | No |
| ZY012             | <i>Brassica napus</i> | No |
| Ding474           | <i>Brassica napus</i> | No |
| Lisora            | <i>Brassica napus</i> | No |
| P617              | <i>Brassica napus</i> | No |
| ZY001             | <i>Brassica napus</i> | No |
| Fan168            | <i>Brassica napus</i> | No |
| Wesway            | <i>Brassica napus</i> | No |
| ZY015             | <i>Brassica napus</i> | No |
| ZY005             | <i>Brassica napus</i> | No |
| 691198            | <i>Brassica napus</i> | No |
| 06-P71-1          | <i>Brassica napus</i> | No |
| 03-p74-4          | <i>Brassica napus</i> | No |
| Wesbell           | <i>Brassica napus</i> | No |
| 04-p34            | <i>Brassica napus</i> | No |
| Marnoo            | <i>Brassica napus</i> | No |
| ZY010             | <i>Brassica napus</i> | No |
| Mutu-98-1         | <i>Brassica napus</i> | No |
| Tower-98-21       | <i>Brassica napus</i> | No |
| ZY004             | <i>Brassica napus</i> | No |
| ZY014             | <i>Brassica napus</i> | No |
| Major             | <i>Brassica napus</i> | No |
| ZY016             | <i>Brassica napus</i> | No |
| Chon nam          | <i>Brassica napus</i> | No |
| 05-P71-11         | <i>Brassica napus</i> | No |
| BLN3614           | <i>Brassica napus</i> | No |
| BLN2762           | <i>Brassica napus</i> | No |
| Range             | <i>Brassica napus</i> | No |
| Surpass400        | <i>Brassica napus</i> | No |
| Ag-Outback        | <i>Brassica napus</i> | No |

---
